# Supplementary material for: Copper(i)/phosphine-catalyzed tandem carboxylation/annulation of terminal alkynes under ambient pressure of CO2: one-pot access to 3a-hydroxyisoxazolo[3,2-a]isoindol-8(3aH)-ones
Source: Royal Society of Chemistry journal article supplement (doi:10.1039/c5gc00926j), 2015-01-01

# SUPPORTING INFORMATION

## **Copper(I)/Phosphine-Catalyzed Tandem Carboxylation/Annulation of Terminal Alkynes with Ambient Pressure of CO<sub>2</sub>: One-Pot Access to 3a-Hydroxyisoxazolo[3,2-*a*]isoindol-8(3*aH*)-ones**

Jia-Ning Xie,<sup>a</sup> Bing Yu,<sup>c</sup> Chun-Xiang Guo,<sup>a</sup> Liang-Nian He<sup>a,b\*</sup>

<sup>a</sup> *State Key Laboratory and Institute of Elemento-Organic Chemistry, Nankai University, Tianjin 300071, China.*

<sup>b</sup> *Collaborative Innovation Center of Chemical Science and Engineering, Nankai University, Tianjin 300071, China*

<sup>c</sup> *Key Laboratory of Cluster Science, Ministry of Education School of Chemistry, Beijing Institute of Technology, 100081, Beijing, P. R. China.*

### **Contents Table**

|                                                               |   |
|---------------------------------------------------------------|---|
| 1. General Information .....                                  | 2 |
| 2. Preparation of potassium phthalimide-N-oxyl (POPINO) ..... | 2 |
| 3. Control experiments .....                                  | 2 |
| 4. Crystallography of compound <b>2b</b> .....                | 3 |
| 5. NMR Spectral Copies of the Products .....                  | 6 |

## 1. General Information

The starting materials were commercially available and all the reactions were carried out in dried glasswares with freshly distilled dry solvents under anhydrous conditions unless otherwise indicated. The products were isolated by column chromatography on silica gel (200-300 mesh) using petroleum ether (60-90 °C) and ethyl acetate. All products were characterized by <sup>1</sup>H NMR, <sup>13</sup>C NMR and mass spectroscopy. NMR spectra were determined on Bruker 400. <sup>1</sup>H NMR chemical shifts were referenced to residual solvent as determined relative to DMSO-*d*<sub>6</sub> (2.50 ppm). The <sup>13</sup>C NMR chemical shifts were reported in ppm relative to the carbon resonance of DMSO-*d*<sub>6</sub> (central peak is 39.52 ppm). <sup>1</sup>H NMR peaks are labeled as singlet (s), doublet (d), triplet (t), and multiplet (m). The coupling constants, *J*, are reported in Hertz (Hz). High resolution mass spectrometry was conducted using a Varian 7.0 T FTICR-MS by ESI technique.

## 2. Preparation of potassium phthalimide-N-oxyl (POPINO)<sup>32</sup>

Into a 100 mL flask was added NHPI (1.63 g, 10 mmol) and KOH (0.056 g, 10 mmol). Then EtOH (50 ml) was added. After reflux conditions for 30 min, the obtained deep red solid was filtered, and washed with cold EtOH (50 mL).

## 3. Control experiments

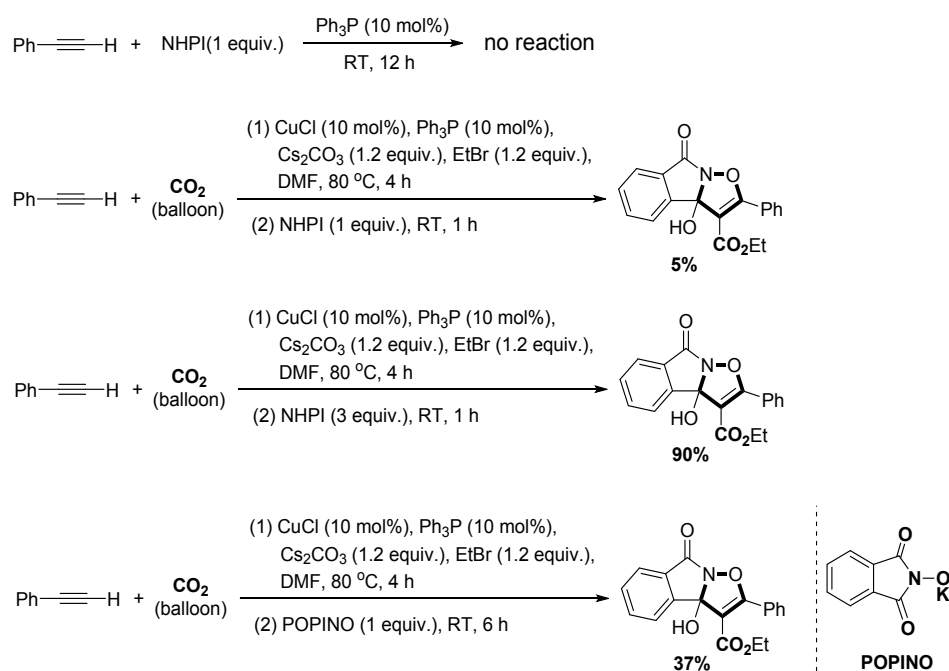

#### 4. Crystallography of compound 2b

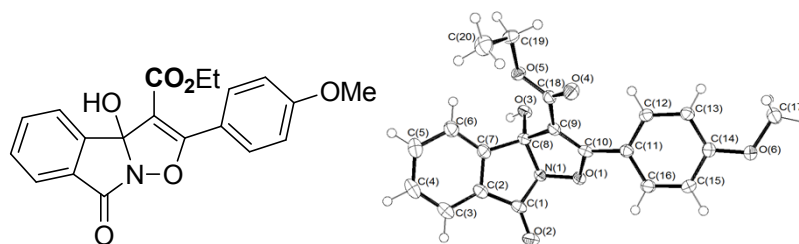

Single-crystal structure of **2b**

**Table S1. Crystal data and structure refinement.**

|                                   |                                                                                                                       |
|-----------------------------------|-----------------------------------------------------------------------------------------------------------------------|
| Empirical formula                 | C <sub>20</sub> H <sub>17</sub> NO <sub>6</sub>                                                                       |
| Temperature                       | 113(2) K                                                                                                              |
| Wavelength                        | 0.71073 Å                                                                                                             |
| Crystal system                    | Monoclinic                                                                                                            |
| space group                       | P2(1)/C                                                                                                               |
| Unit cell dimensions              | a = 7.8241(16) Å<br>b = 24.301(5) Å<br>c = 9.1574(18) Å<br>alpha = 90 deg.<br>beta = 93.76(3) deg.<br>gamma = 90 deg. |
| Volume                            | 1737.4(6) Å <sup>3</sup>                                                                                              |
| Z                                 | 4                                                                                                                     |
| Calculated density                | 1.404 Mg/m <sup>3</sup>                                                                                               |
| Absorption coefficient            | 0.105 mm <sup>-1</sup>                                                                                                |
| F(000)                            | 768                                                                                                                   |
| Crystal size                      | 0.20 x 0.18 x 0.12 mm                                                                                                 |
| Theta range for data collection   | 1.68 to 27.99 deg.                                                                                                    |
| Reflections collected / unique    | 15793 / 4064 [R(int) = 0.0590]                                                                                        |
| Data / restraints / parameters    | 4064 / 0 / 248                                                                                                        |
| Goodness-of-fit on F <sup>2</sup> | 0.979                                                                                                                 |
| Final R indices [I > 2sigma(I)]   | R1 = 0.0499, wR2 = 0.1200                                                                                             |
| R indices (all data)              | R1 = 0.0660, wR2 = 0.1305                                                                                             |

**Table S2. Bond lengths [Å] and angles [deg].**

|            |            |
|------------|------------|
| O(1)-C(10) | 1.3835(17) |
| O(1)-N(1)  | 1.4338(16) |
| O(2)-C(1)  | 1.2178(19) |
| O(3)-C(8)  | 1.4046(17) |
| O(4)-C(18) | 1.2147(18) |
| O(5)-C(18) | 1.3399(18) |

|                  |            |
|------------------|------------|
| O(5)-C(19)       | 1.4610(17) |
| O(6)-C(14)       | 1.3597(19) |
| O(6)-C(17)       | 1.4328(19) |
| N(1)-C(1)        | 1.4114(18) |
| N(1)-C(8)        | 1.4921(19) |
| C(1)-C(2)        | 1.477(2)   |
| C(2)-C(3)        | 1.385(2)   |
| C(2)-C(7)        | 1.393(2)   |
| C(3)-C(4)        | 1.386(3)   |
| C(4)-C(5)        | 1.394(2)   |
| C(5)-C(6)        | 1.396(2)   |
| C(6)-C(7)        | 1.387(2)   |
| C(7)-C(8)        | 1.521(2)   |
| C(8)-C(9)        | 1.514(2)   |
| C(9)-C(10)       | 1.342(2)   |
| C(9)-C(18)       | 1.468(2)   |
| C(10)-C(11)      | 1.468(2)   |
| C(11)-C(12)      | 1.396(2)   |
| C(11)-C(16)      | 1.396(2)   |
| C(12)-C(13)      | 1.384(2)   |
| C(13)-C(14)      | 1.388(2)   |
| C(14)-C(15)      | 1.402(2)   |
| C(15)-C(16)      | 1.384(2)   |
| C(19)-C(20)      | 1.504(2)   |
| C(10)-O(1)-N(1)  | 105.26(11) |
| C(18)-O(5)-C(19) | 116.42(12) |
| C(14)-O(6)-C(17) | 118.46(12) |
| C(1)-N(1)-O(1)   | 112.31(12) |
| C(1)-N(1)-C(8)   | 110.78(12) |
| O(1)-N(1)-C(8)   | 109.35(10) |
| O(2)-C(1)-N(1)   | 123.84(15) |
| O(2)-C(1)-C(2)   | 130.83(14) |
| N(1)-C(1)-C(2)   | 105.33(13) |
| C(3)-C(2)-C(7)   | 122.21(16) |
| C(3)-C(2)-C(1)   | 129.32(15) |
| C(7)-C(2)-C(1)   | 108.46(13) |
| C(2)-C(3)-C(4)   | 117.56(16) |
| C(3)-C(4)-C(5)   | 120.90(16) |
| C(4)-C(5)-C(6)   | 121.12(17) |
| C(7)-C(6)-C(5)   | 118.04(16) |
| C(6)-C(7)-C(2)   | 120.15(14) |
| C(6)-C(7)-C(8)   | 129.45(14) |
| C(2)-C(7)-C(8)   | 110.28(13) |
| O(3)-C(8)-N(1)   | 112.54(11) |

|                   |            |
|-------------------|------------|
| O(3)-C(8)-C(9)    | 109.27(12) |
| N(1)-C(8)-C(9)    | 99.62(12)  |
| O(3)-C(8)-C(7)    | 113.00(13) |
| N(1)-C(8)-C(7)    | 100.79(11) |
| C(9)-C(8)-C(7)    | 120.41(12) |
| C(10)-C(9)-C(18)  | 126.58(14) |
| C(10)-C(9)-C(8)   | 108.95(13) |
| C(18)-C(9)-C(8)   | 124.41(14) |
| C(9)-C(10)-O(1)   | 113.13(13) |
| C(9)-C(10)-C(11)  | 134.56(14) |
| O(1)-C(10)-C(11)  | 112.12(13) |
| C(12)-C(11)-C(16) | 118.79(14) |
| C(12)-C(11)-C(10) | 121.20(13) |
| C(16)-C(11)-C(10) | 119.90(13) |
| C(13)-C(12)-C(11) | 121.70(14) |
| C(12)-C(13)-C(14) | 118.84(14) |
| O(6)-C(14)-C(13)  | 124.31(14) |
| O(6)-C(14)-C(15)  | 115.20(14) |
| C(13)-C(14)-C(15) | 120.48(14) |
| C(16)-C(15)-C(14) | 119.88(15) |
| C(15)-C(16)-C(11) | 120.29(14) |
| O(4)-C(18)-O(5)   | 123.93(14) |
| O(4)-C(18)-C(9)   | 125.50(15) |
| O(5)-C(18)-C(9)   | 110.56(13) |
| O(5)-C(19)-C(20)  | 111.00(13) |

## 5. NMR Spectral Copies of the Products

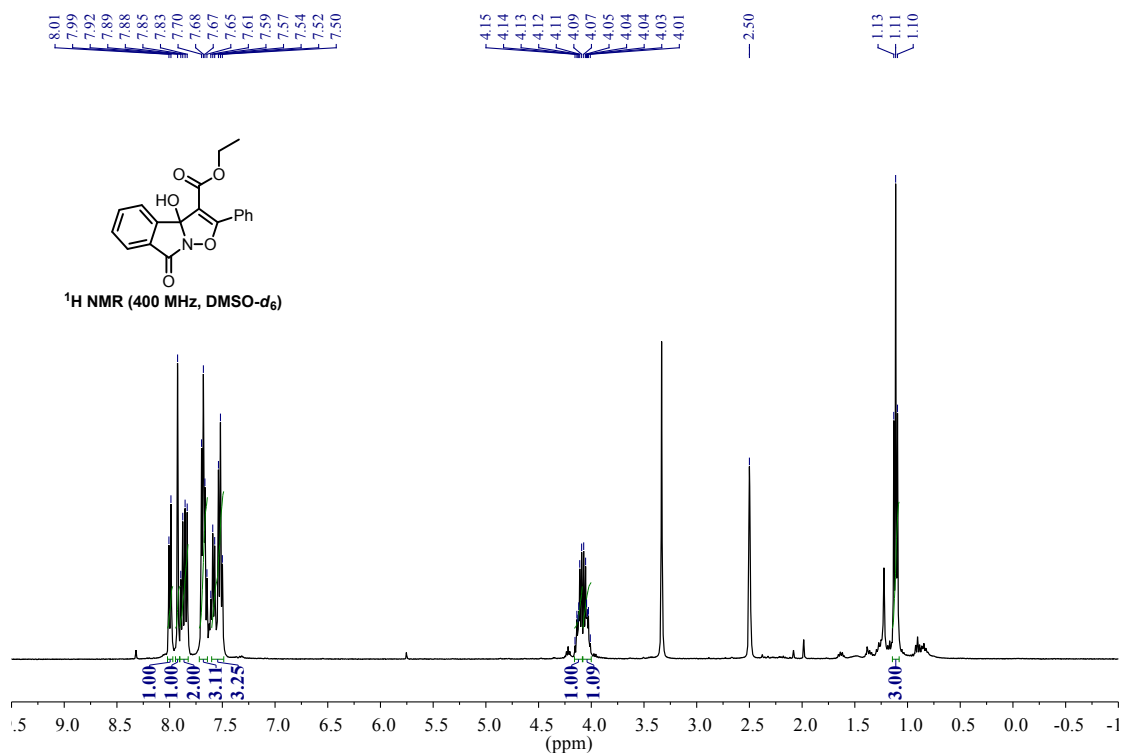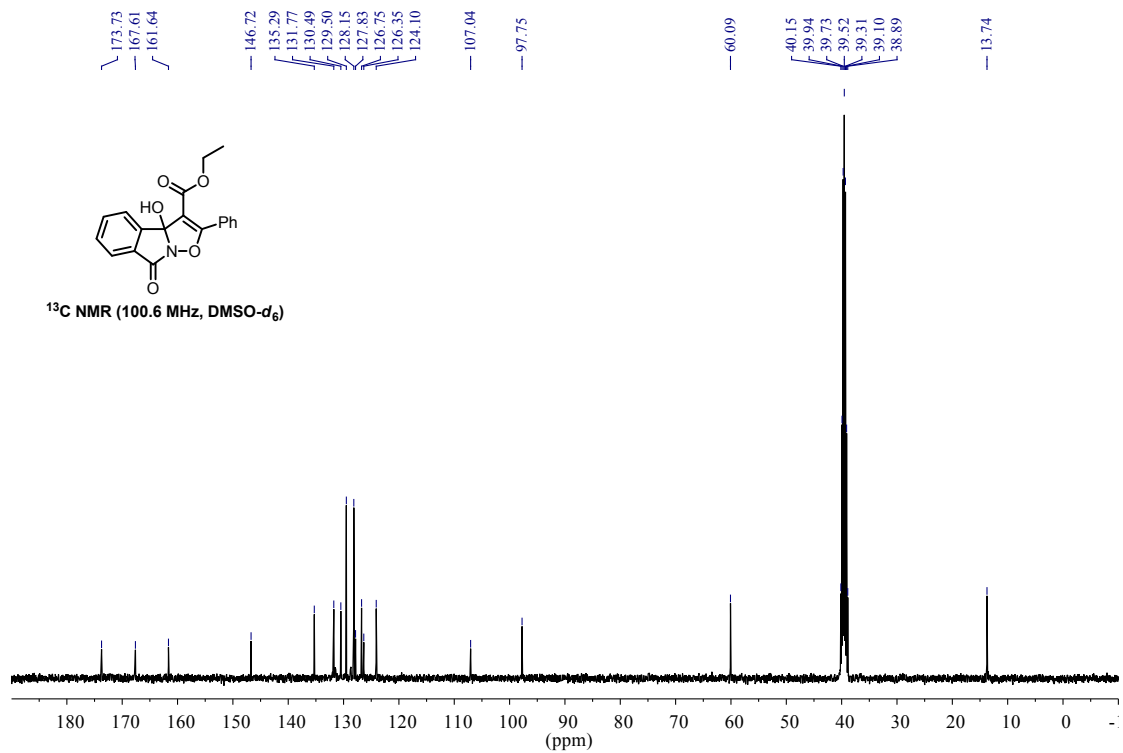

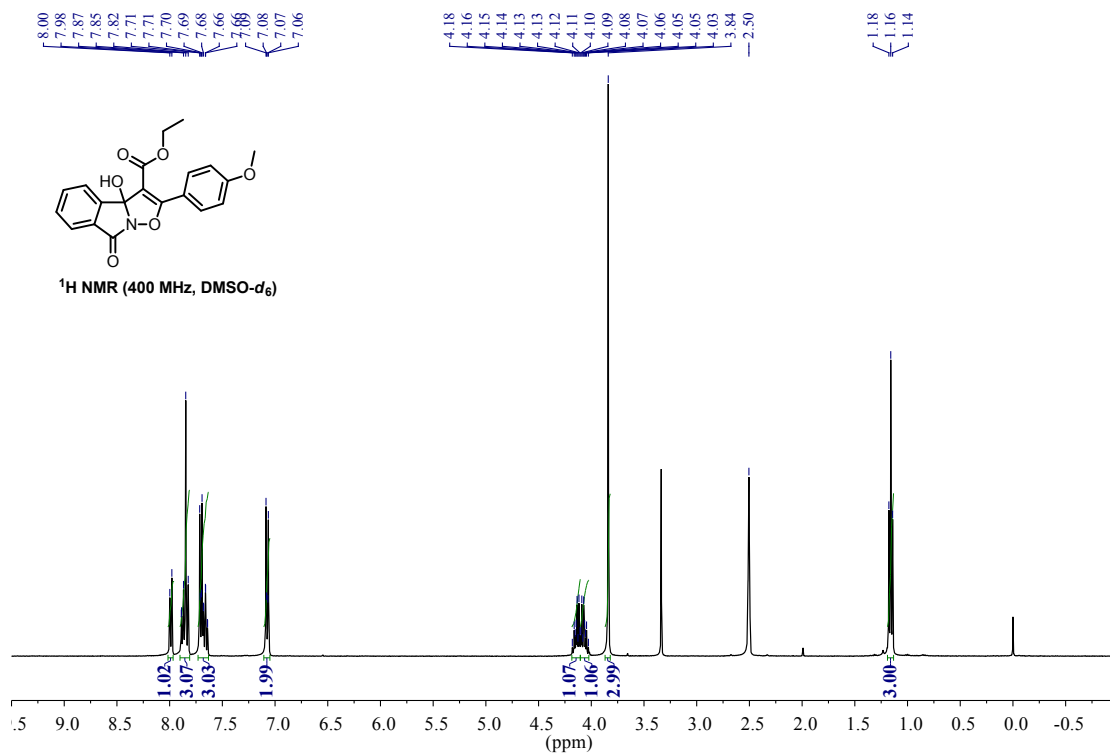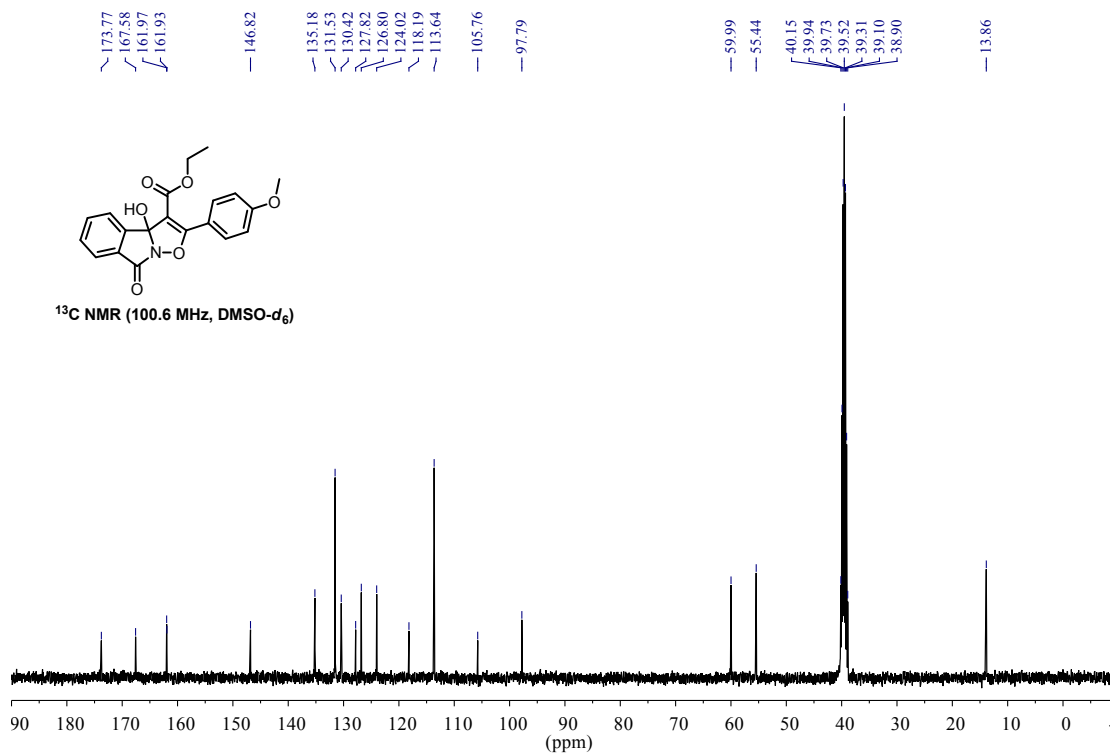

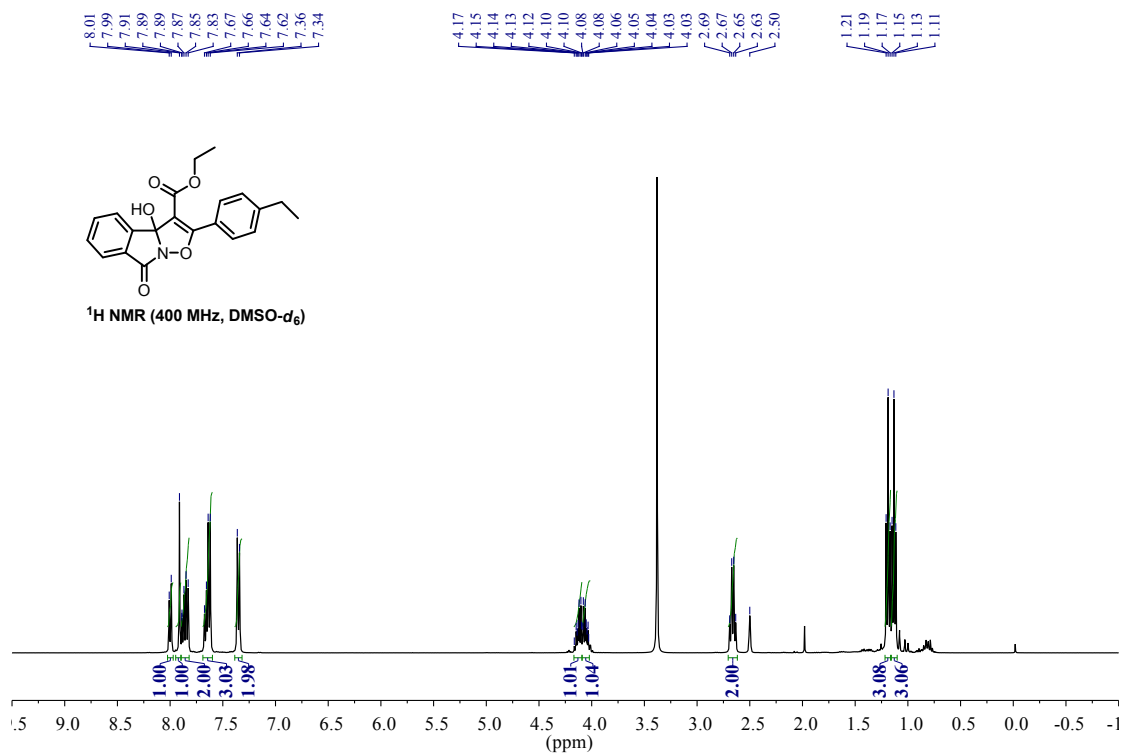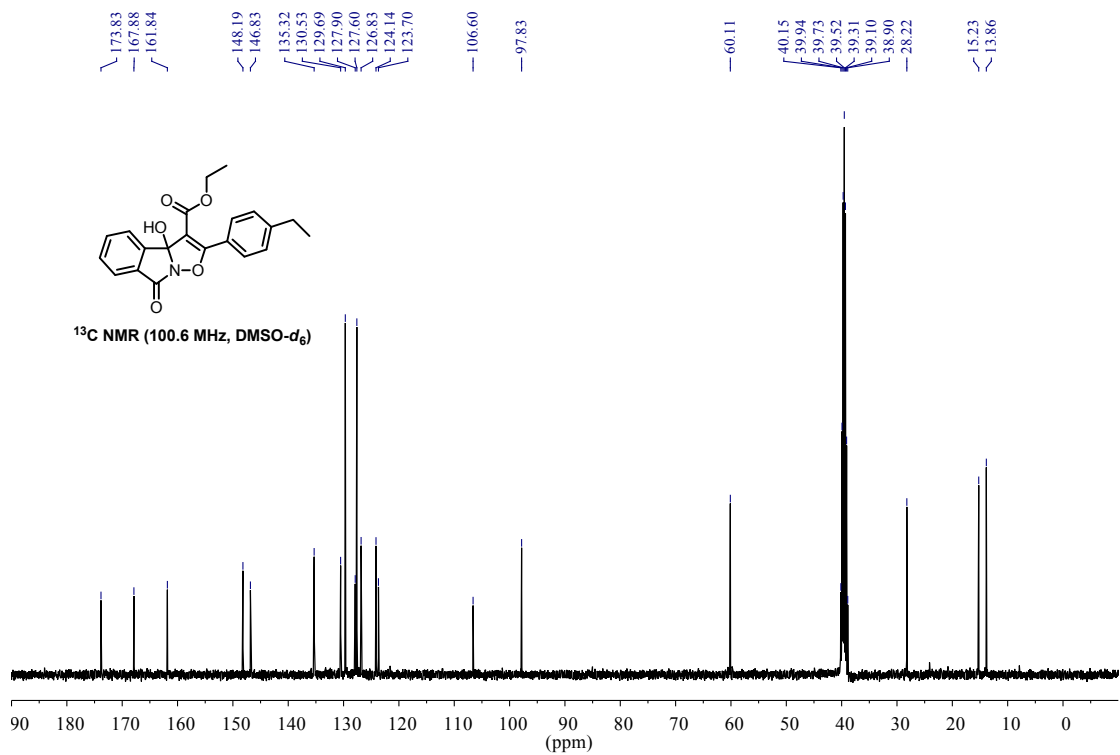



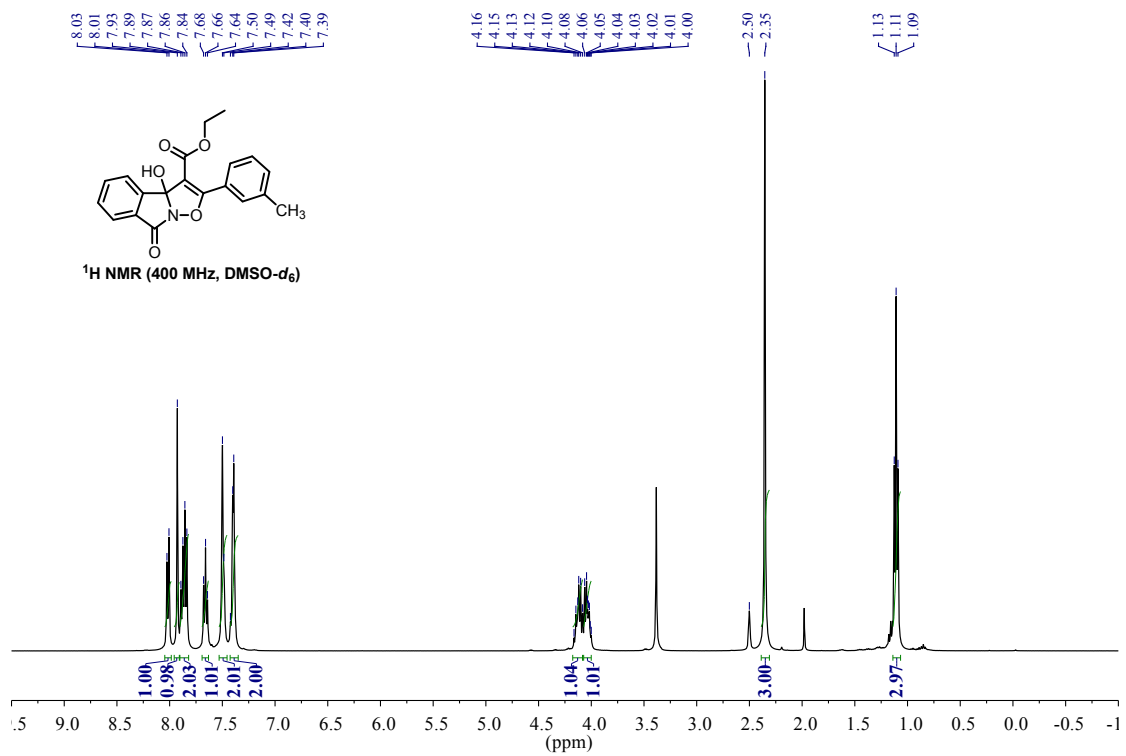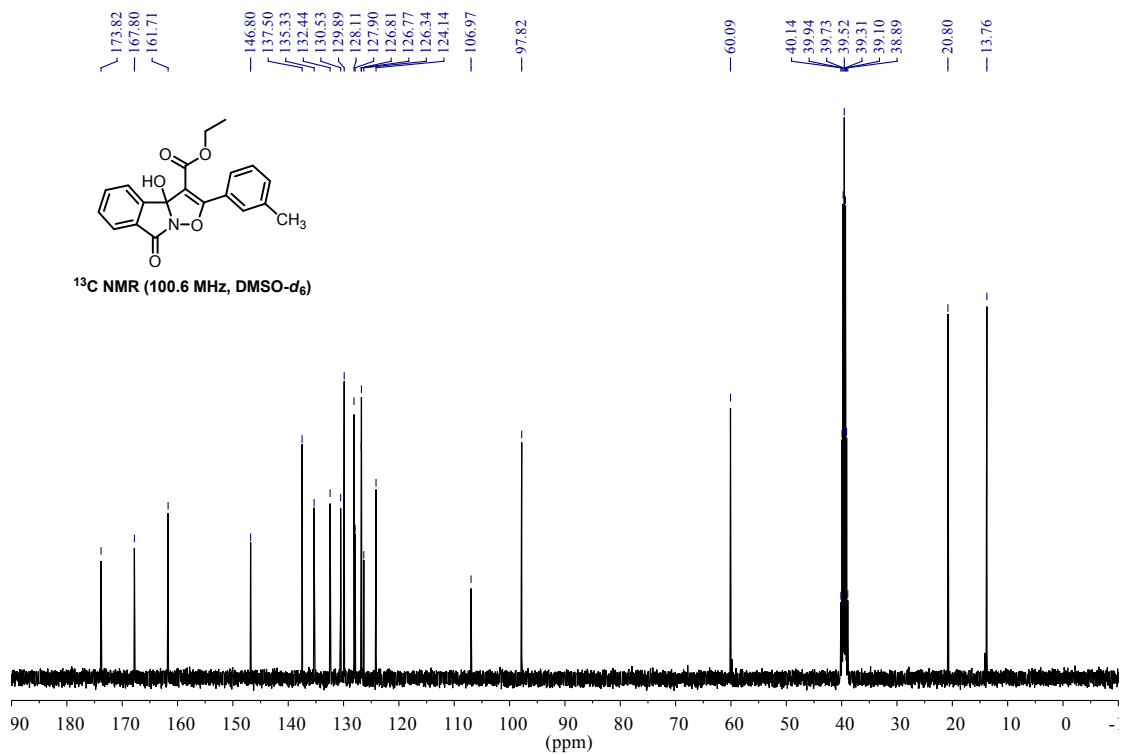

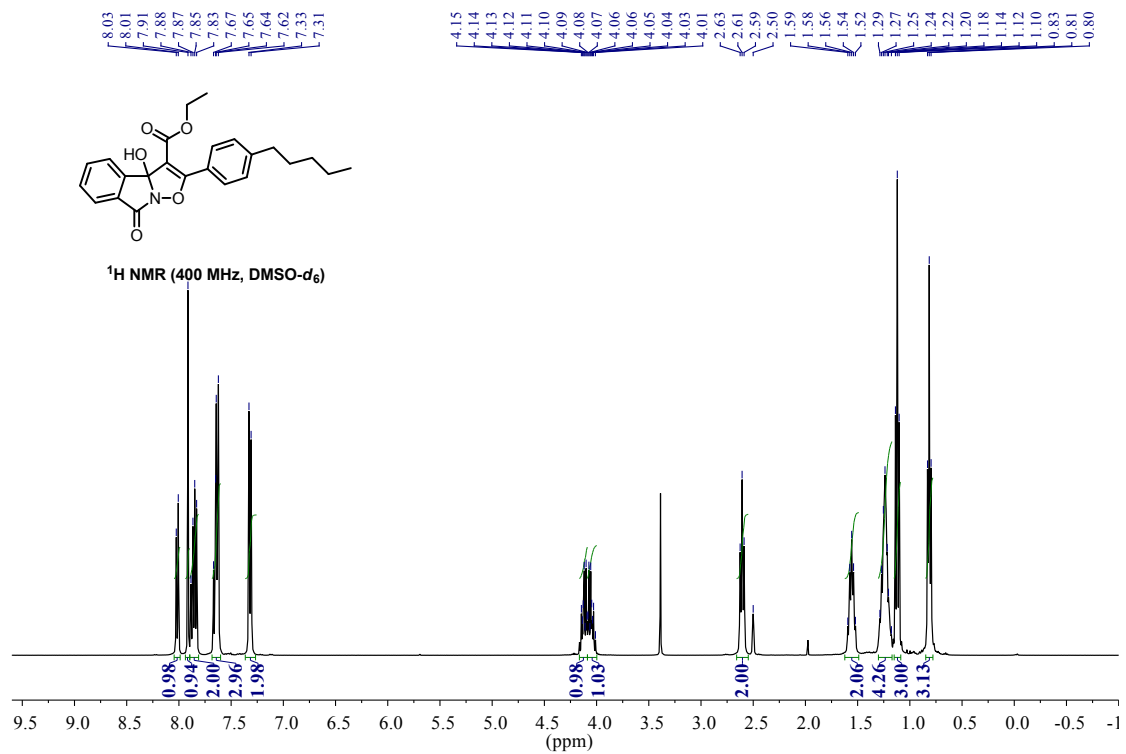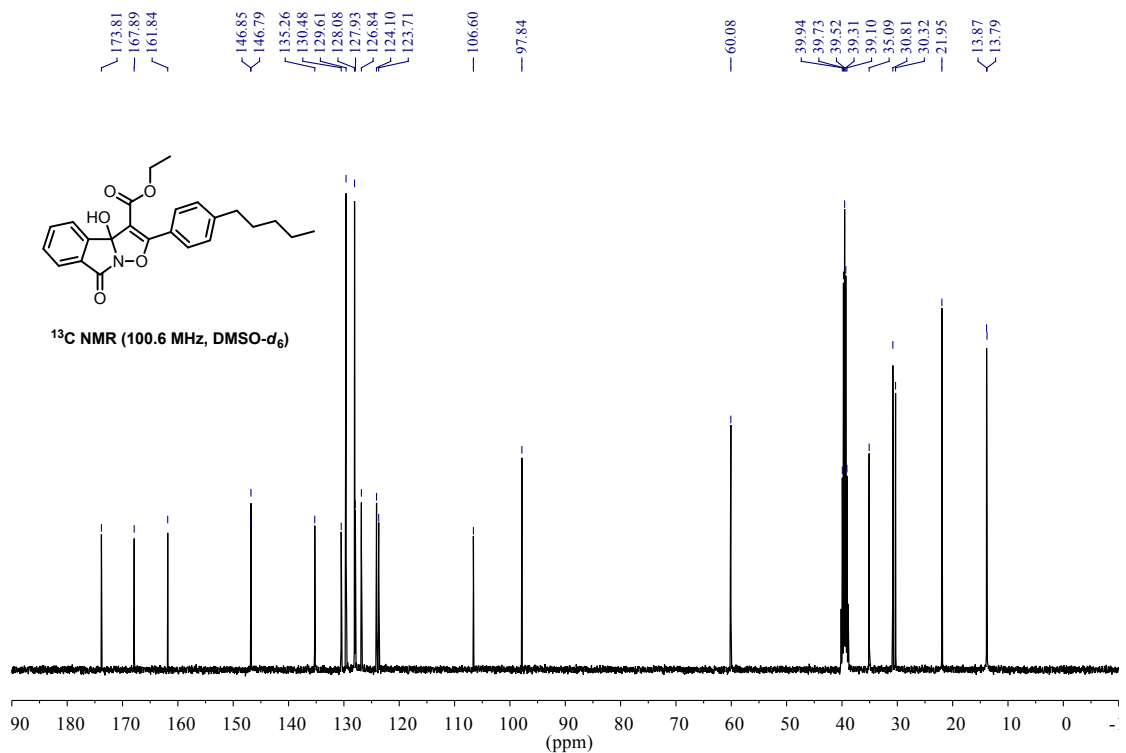

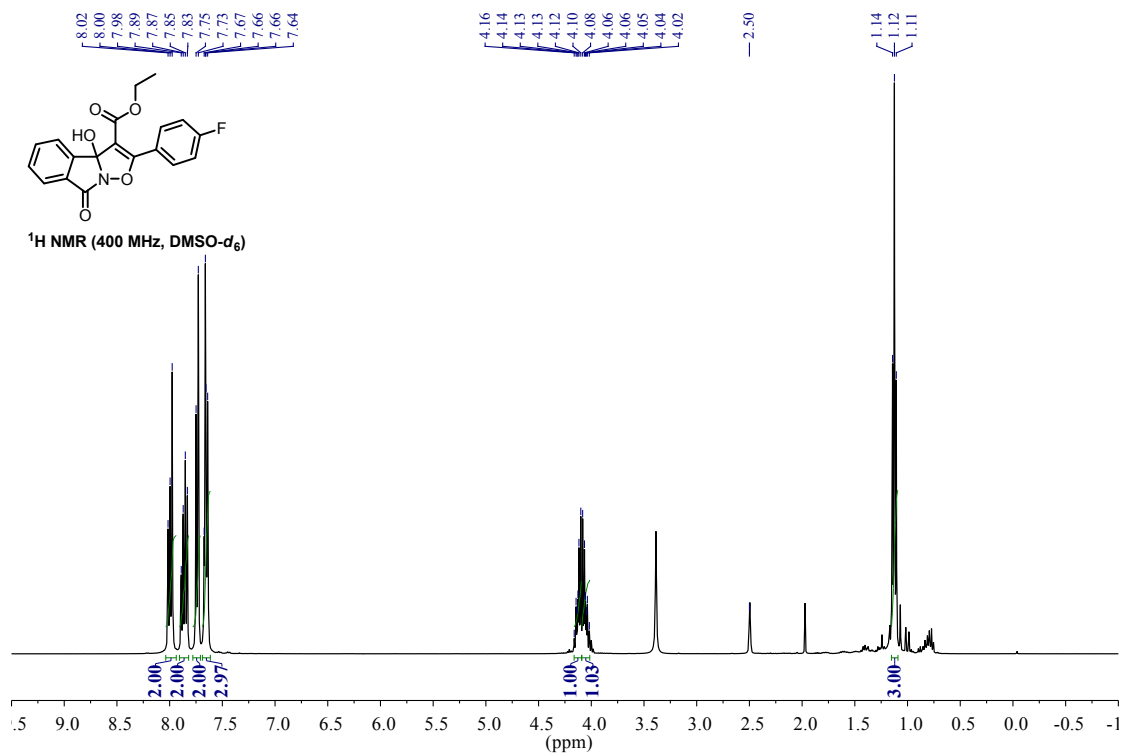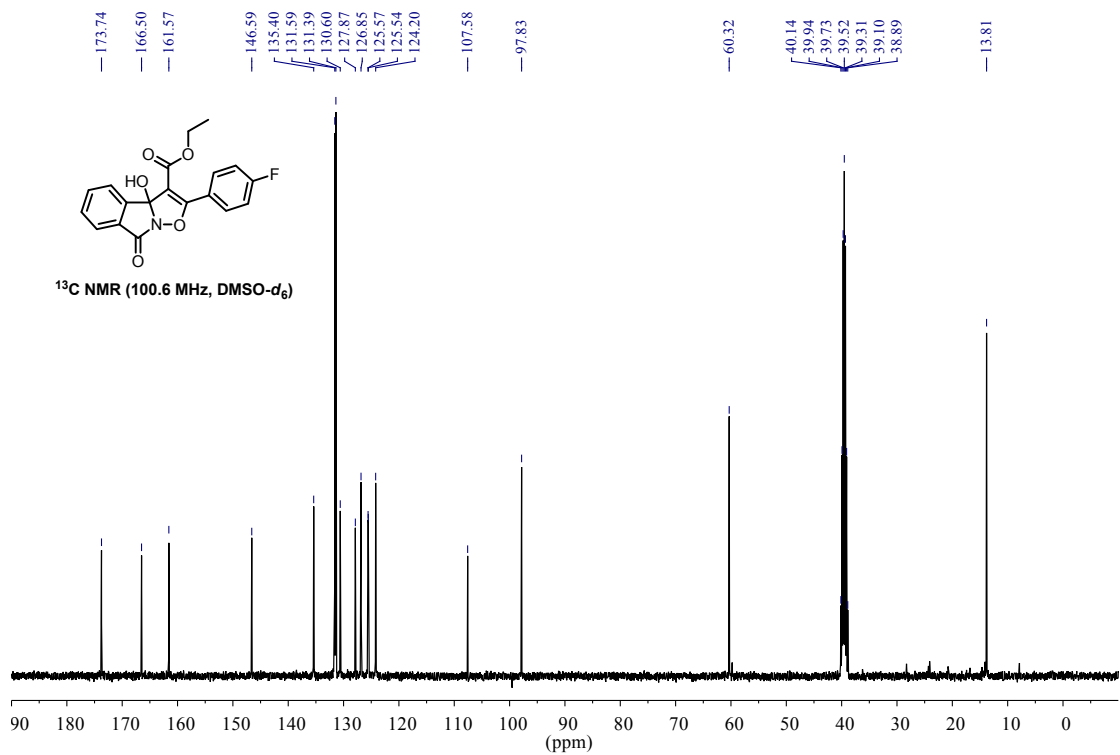

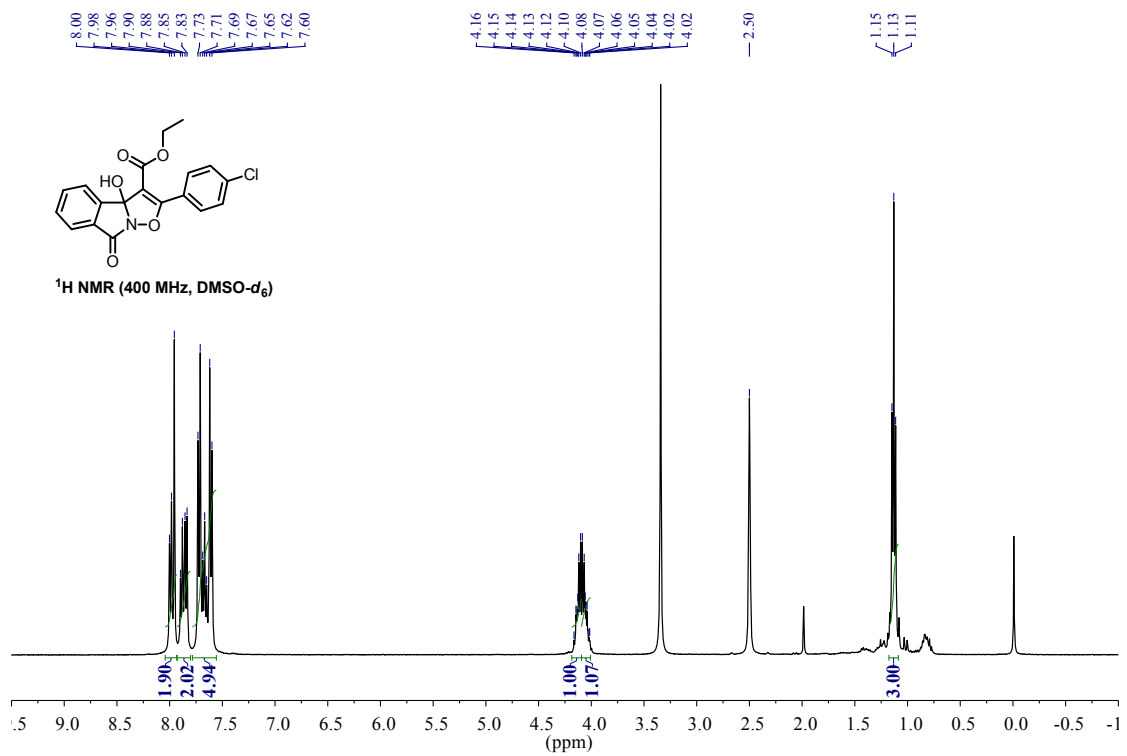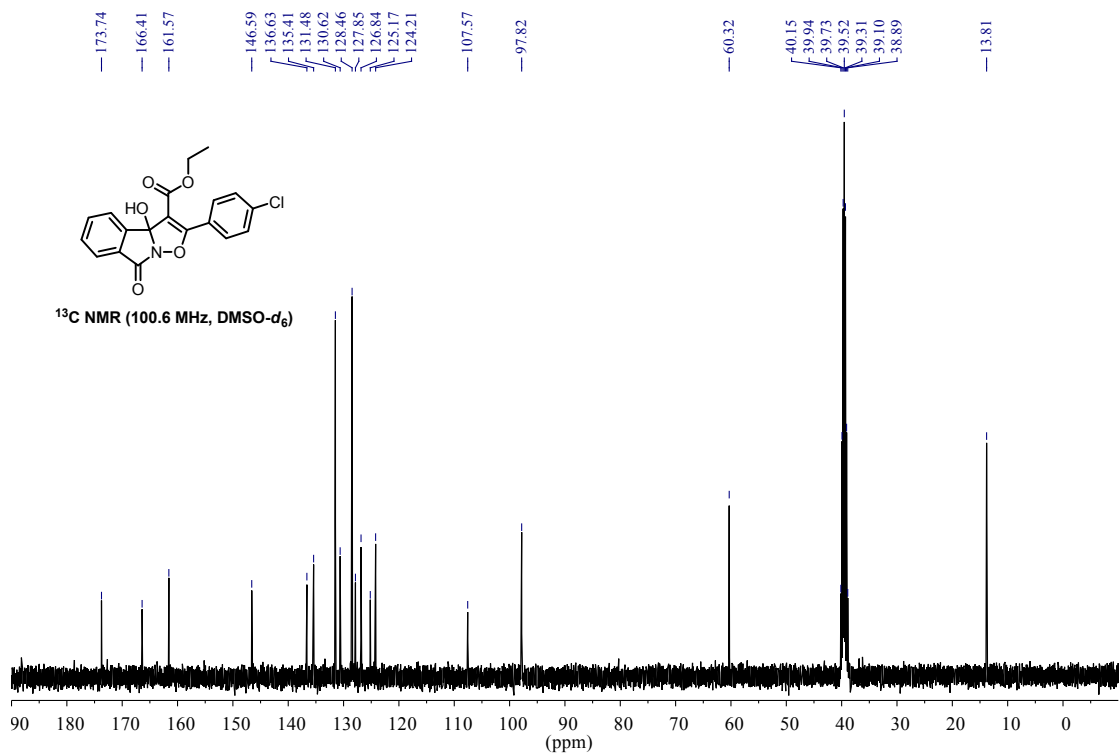

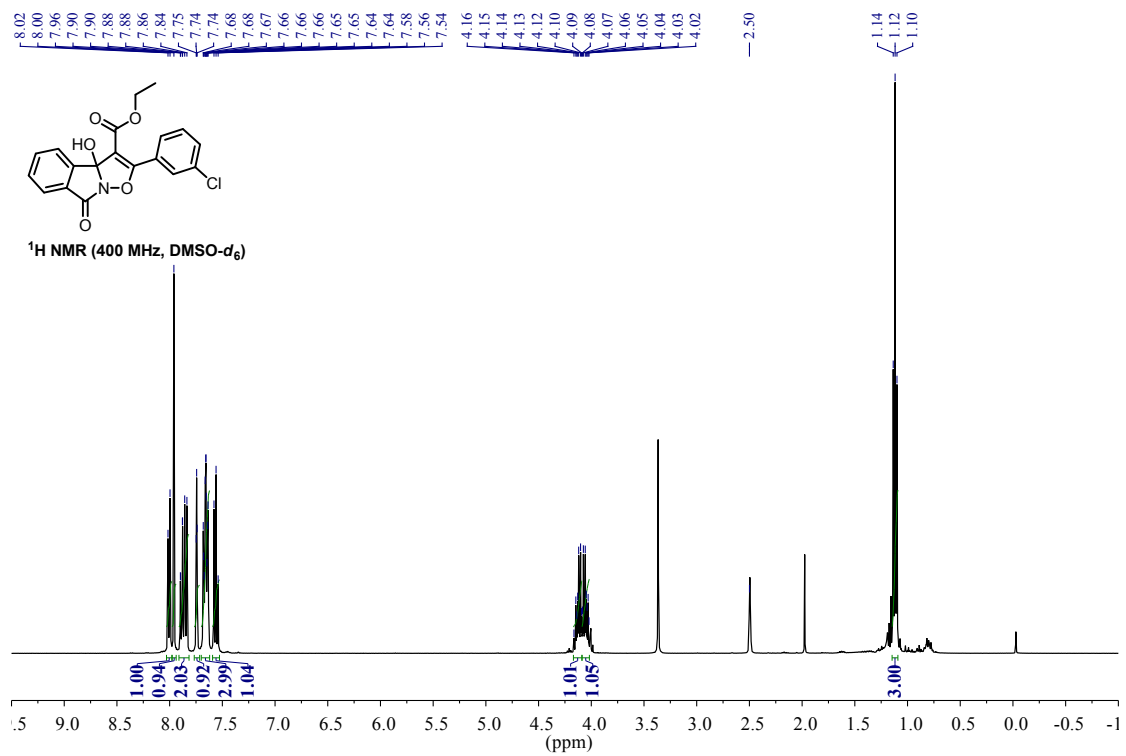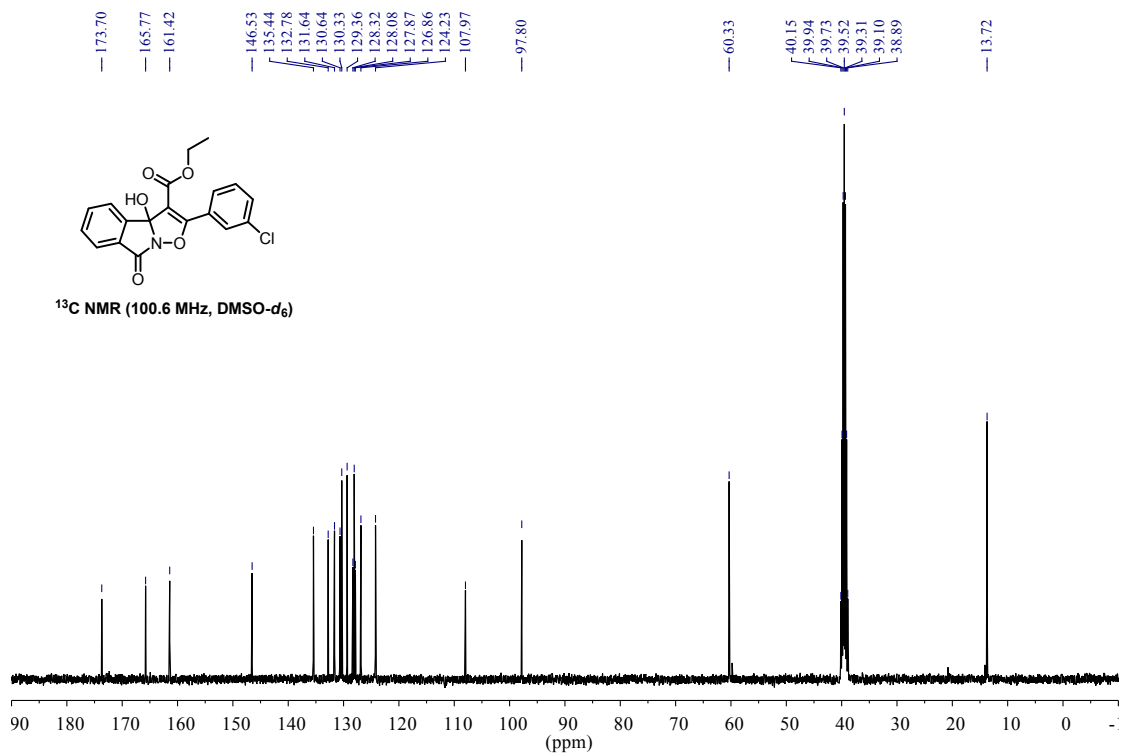

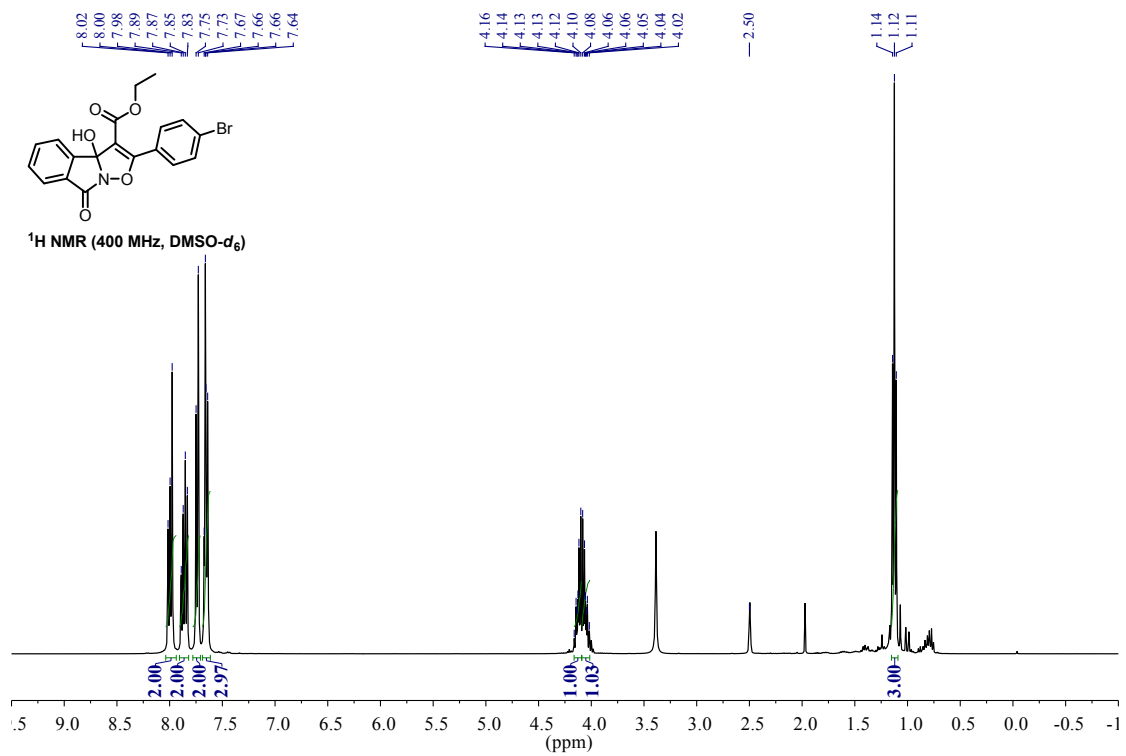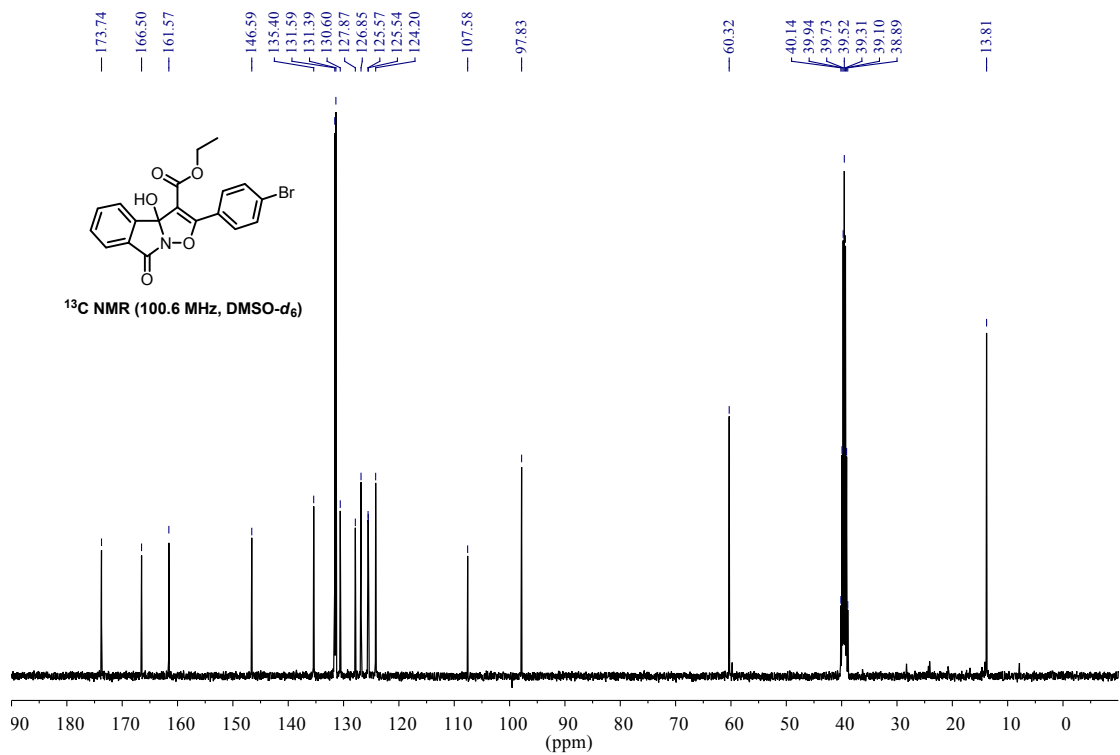

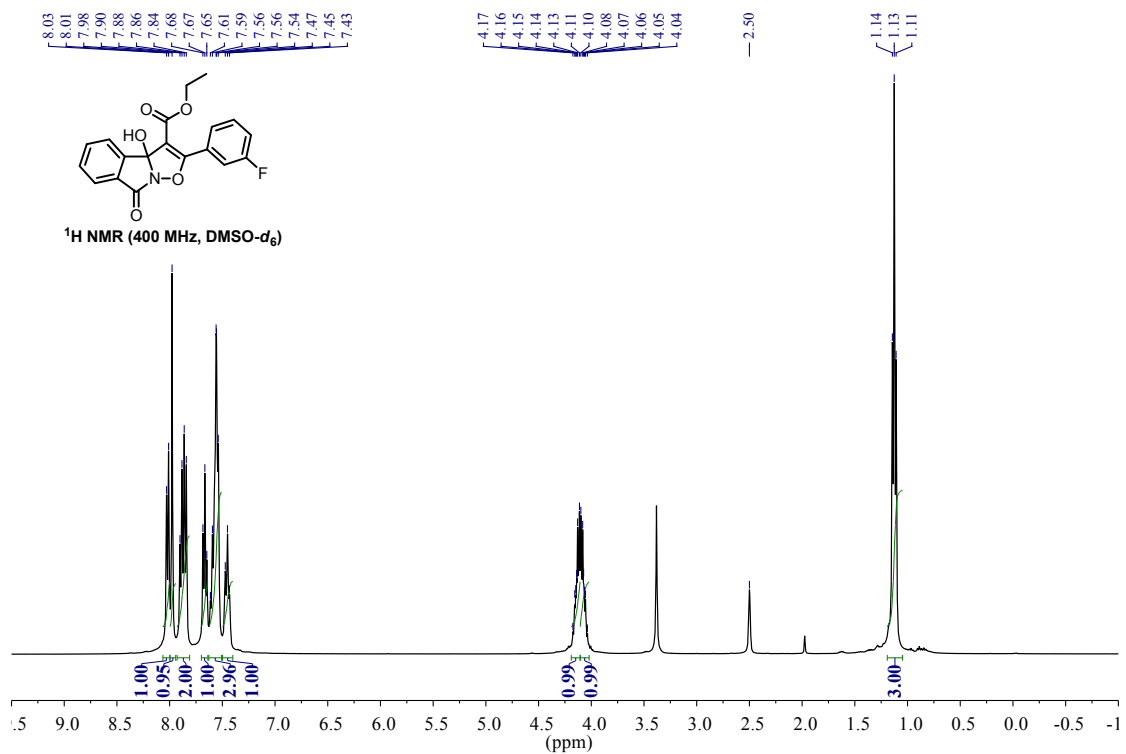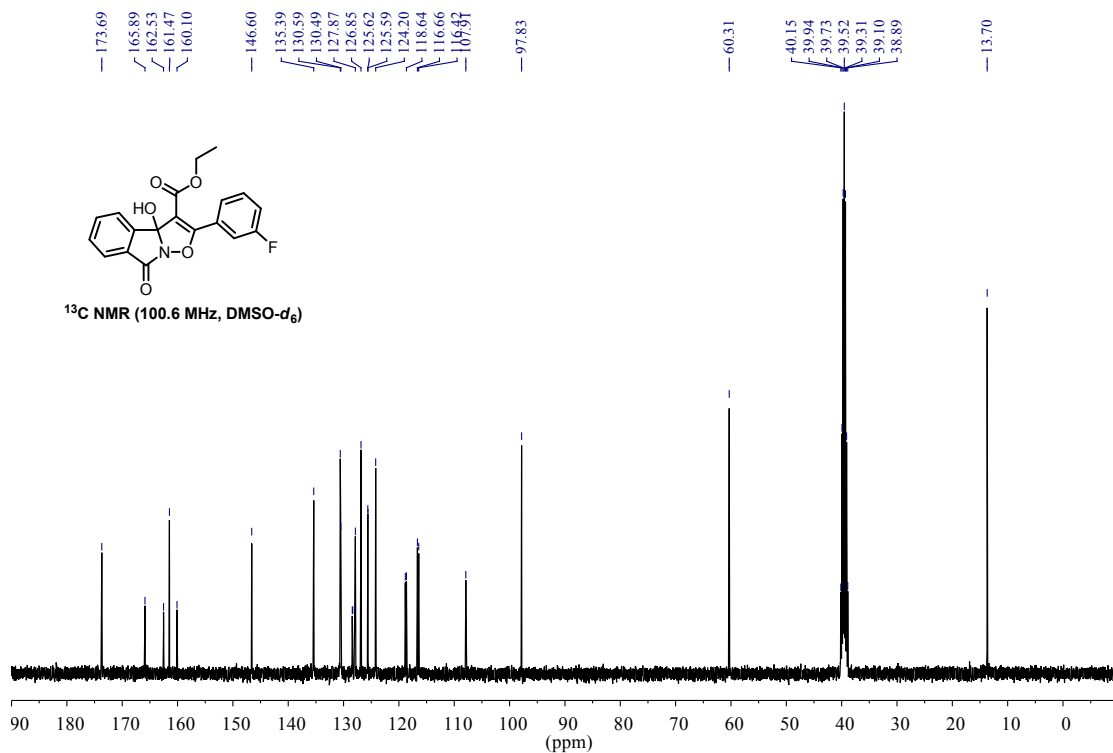

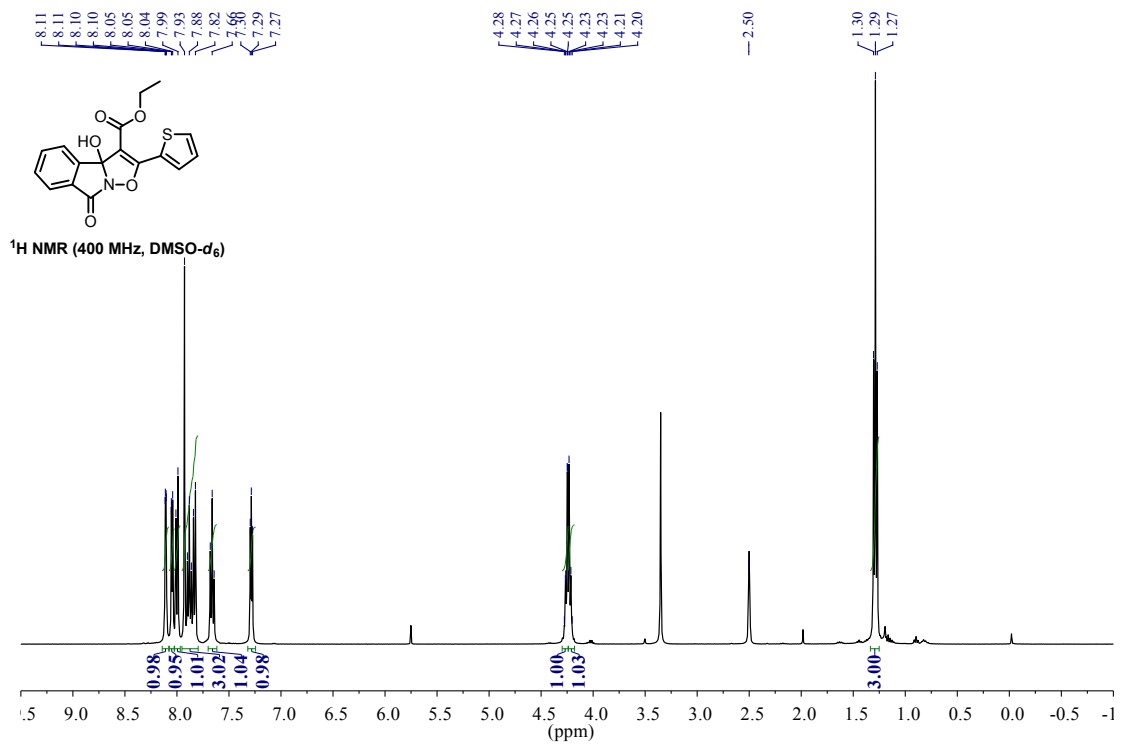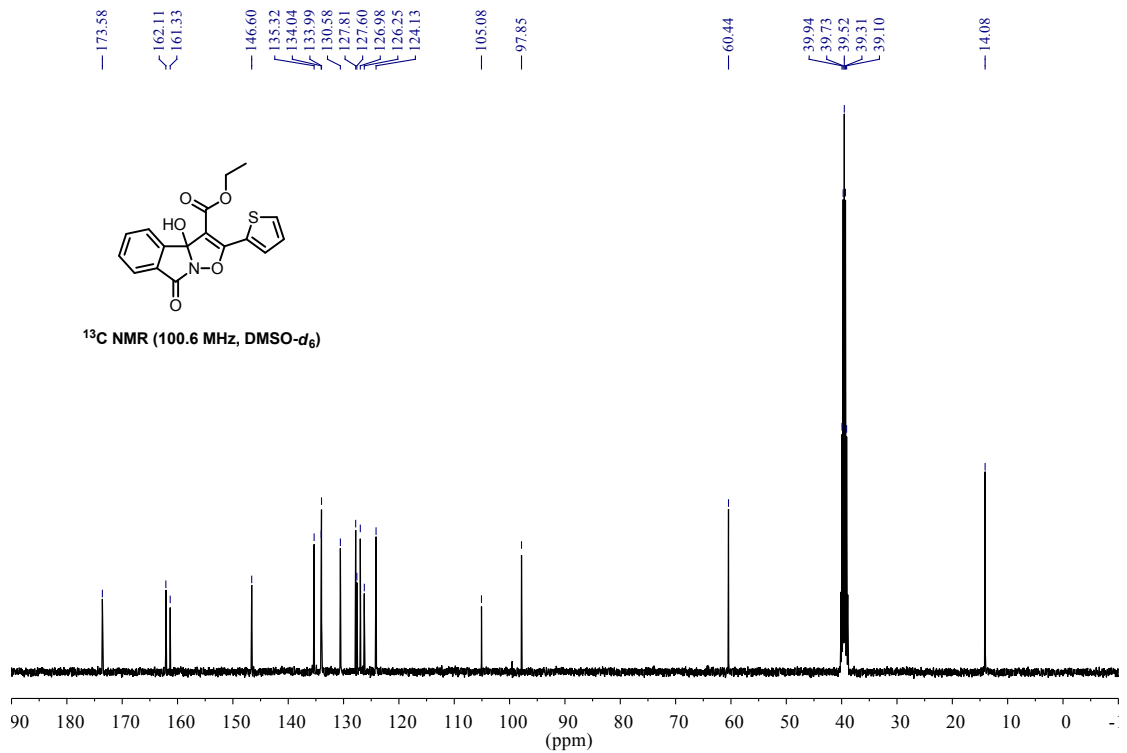



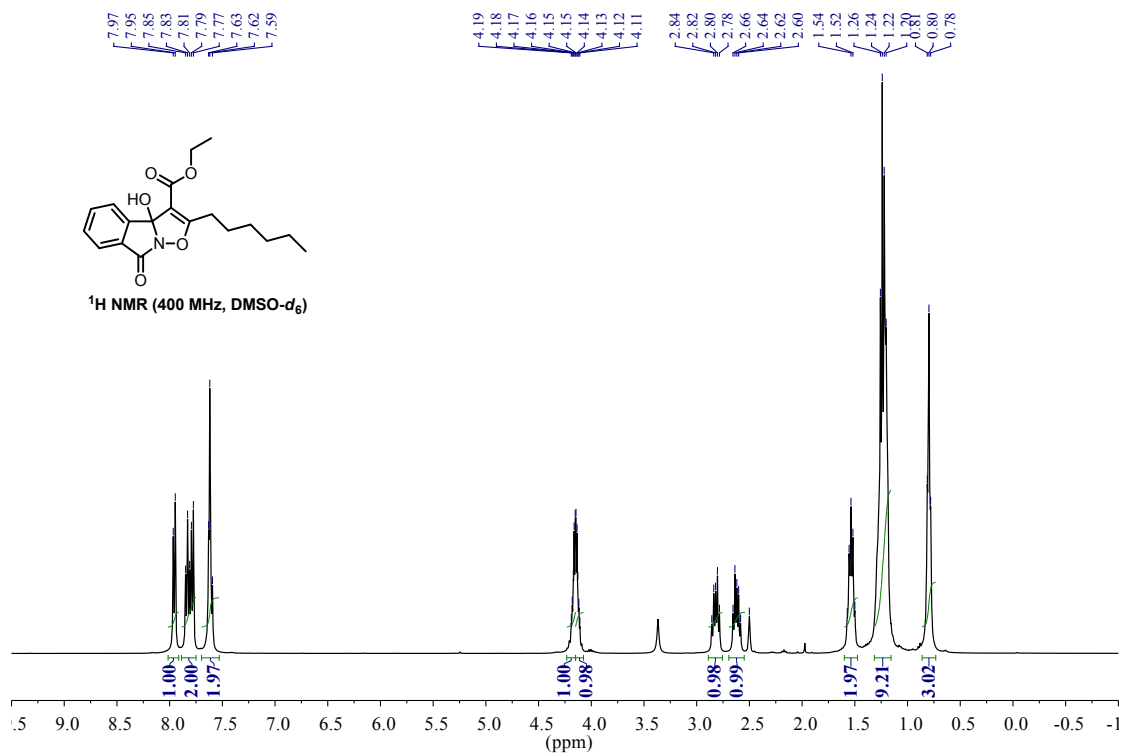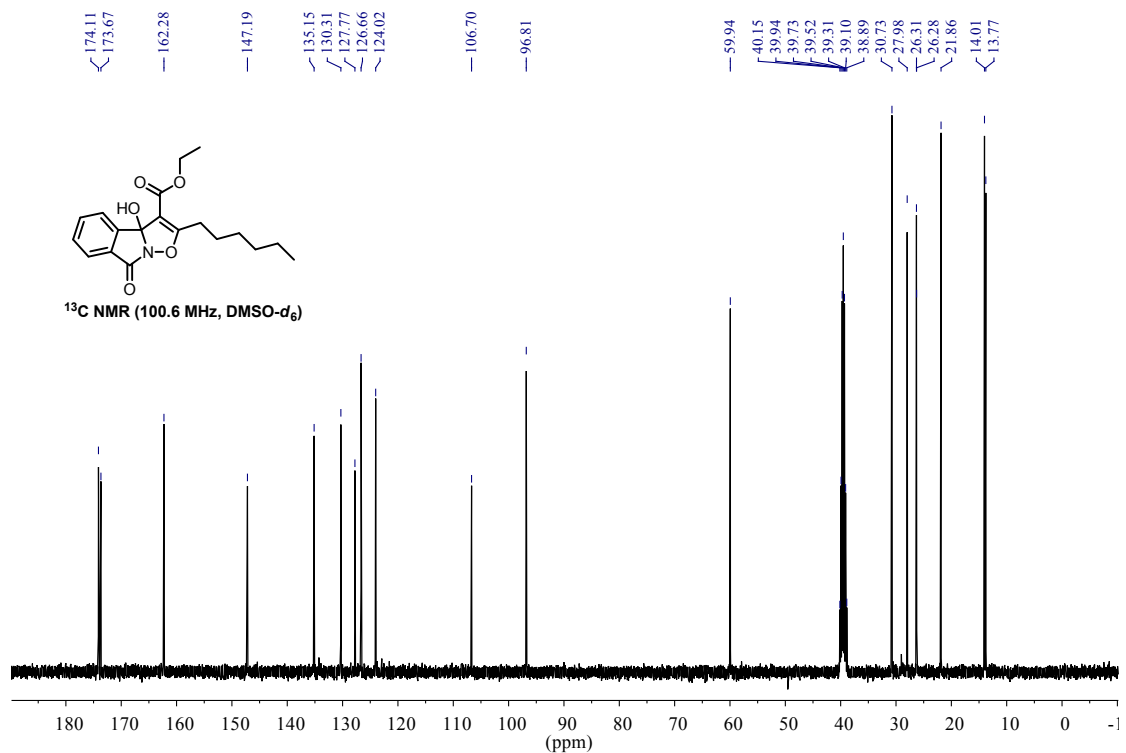

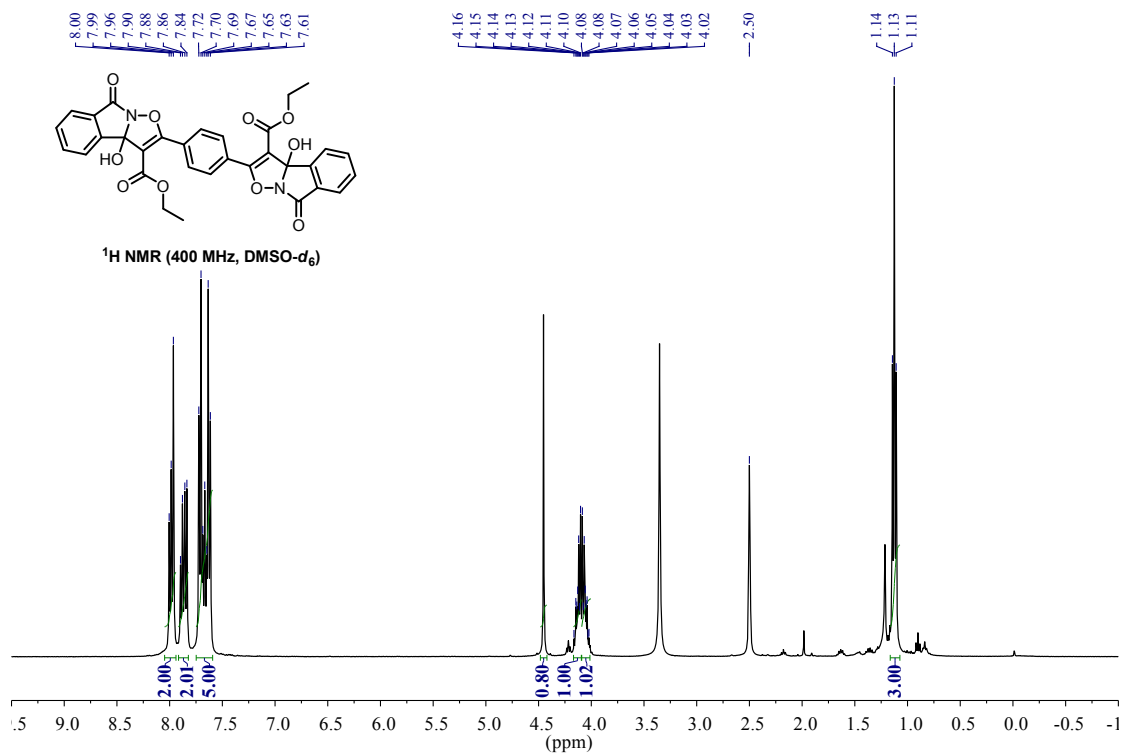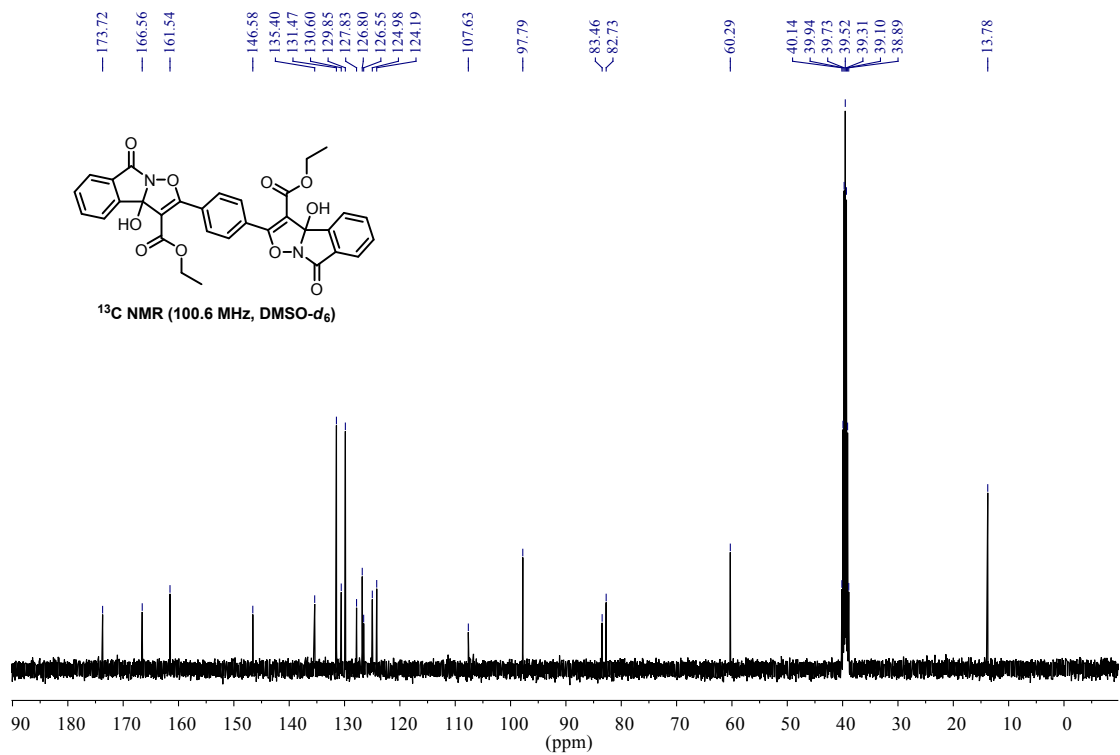

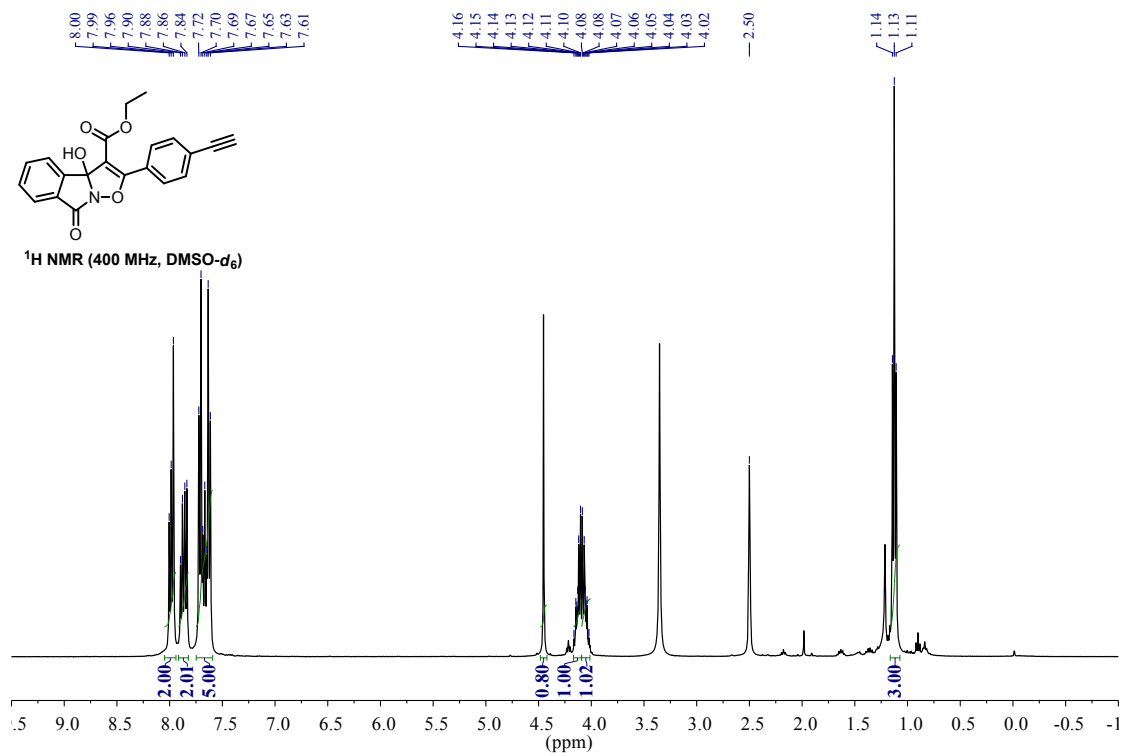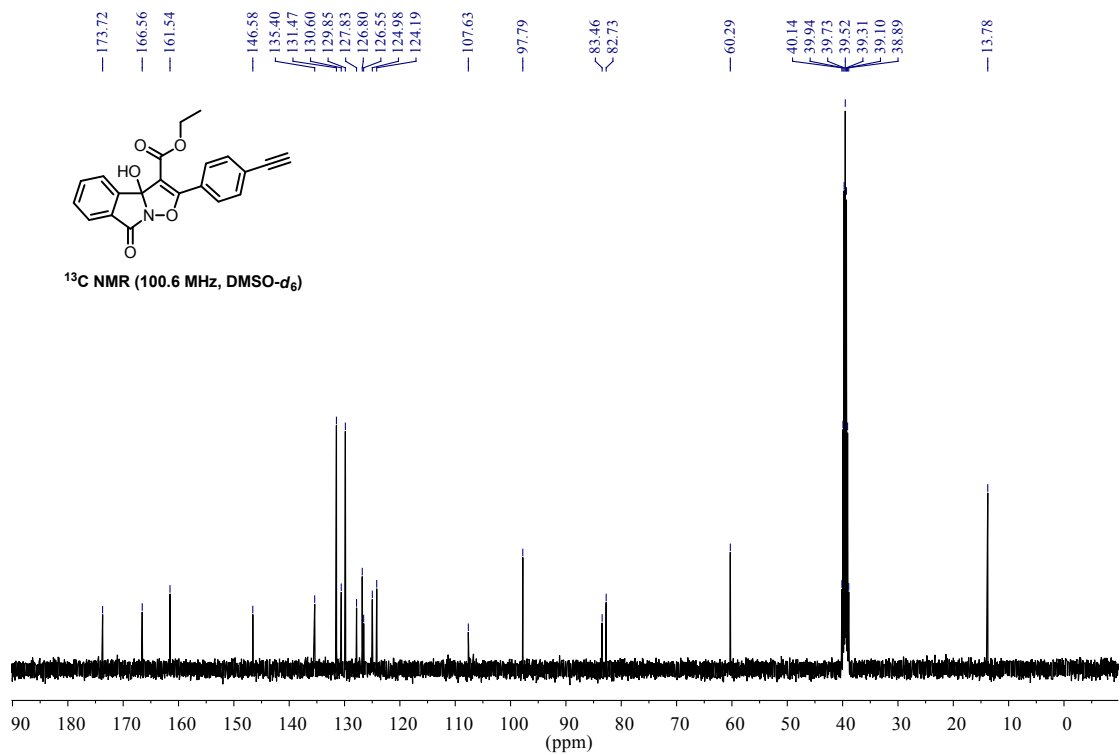

Supplement: c5gc00926j1.pdf [file c5gc00926j1.pdf]
